# Supplementary material for: Metabolite extraction from adherently growing mammalian cells for metabolomics studies: optimization of harvesting and extraction protocols
Source: Springer Nature journal article supplement (doi:10.1007/s00216-010-4425-x), 2010-12-01
Supplement: MOESM1 [file 216_2010_4425_MOESM1_ESM.pdf]

## **Analytical and Bioanalytical Chemistry**

### **Electronic Supplementary Material**

# **Metabolite extraction from adherently growing mammalian cells for metabolomics studies: Optimization of harvesting and extraction protocols**

Katja Dettmer, Nadine Nürnberger, Hannelore Kaspar, Michael A. Gruber, Martin F. Almstetter, Peter J. Oefner

**Table S1** Results of the Tukey range test applied to the data presented in table 3-4. For each quantified metabolite all pair wise solvent comparisons were tested for scraped and trypsinated cells. Only solvent comparisons are listed that yielded significantly different metabolite recoveries with a P-value < 0.05. Extraction solvents are coded by a letter as shown in table 3-5.

| <b>Metabolite</b>    | <b>Scrape</b>                                                   | <b>Trypsin</b>                                        |
|----------------------|-----------------------------------------------------------------|-------------------------------------------------------|
| <b>Alanine</b>       | A:D, B:D, C:D, E:D, F:D, G:D                                    | A:B, A:D, B:D, C:D, E:D, F:A, F:D, G:B, G:D           |
| <b>Glycine</b>       | A:D, B:D, C:D, E:D, F:D, G:D                                    | A:D, B:D, C:D, E:D, F:D, G:D                          |
| <b>Valine</b>        |                                                                 |                                                       |
| <b>Leucine</b>       | A:D, C:D, E:D, G:D                                              | A:D, B:D, C:D, E:D, F:A, F:D, G:D                     |
| <b>Iso-Leucine</b>   | A:D                                                             | A:D, C:D, E:D, F:A, F:G, G:D                          |
| <b>Proline</b>       | A:D, B:D, C:D, E:D, F:D, G:D                                    | A:B, B:D, C:D, E:D, F:A, F:D, F:G, G:D                |
| <b>Asparagine</b>    |                                                                 |                                                       |
| <b>Aspartate</b>     | A:D, B:D, C:D, E:D, F:D, G:D                                    |                                                       |
| <b>Methionine</b>    |                                                                 |                                                       |
| <b>Glutamate</b>     | C:B, F:C                                                        |                                                       |
| <b>Phenylalanine</b> | A:D                                                             | A:D, C:D, F:D                                         |
| <b>Ornithine</b>     | A:D, A:G, B:D, C:D, E:D, F:D, G:D                               | A:E, B:E                                              |
| <b>Lysine</b>        | A:D, A:G, B:D, C:D, C:E, E:D, F:C, F:D, F:G, G:B, G:D, G:E      | A:D, B:D, C:A, C:B, C:D, E:D, F:D, G:D                |
| <b>Histidine</b>     | A:B, C:B, G:B                                                   |                                                       |
| <b>Tyrosine</b>      | A:B, A:D, B:D, C:B, C:D, E:D, F:A, F:C, F:D, G:D                | B:D, F:A, F:D, F:G, G:B                               |
| <b>Tryptophan</b>    |                                                                 | A:B, F:A, F:G, G:B                                    |
| <b>Lactate</b>       |                                                                 |                                                       |
| <b>Succinate</b>     |                                                                 | A:B                                                   |
| <b>Fumarate</b>      | A:E, A:G, B:E, C:E, C:G, F:A, F:B, F:C, G:B                     | A:E, A:G, C:G, F:A, G:B                               |
| <b>Malate</b>        |                                                                 |                                                       |
| <b>Citrate</b>       | A:B, A:G, B:E, C:A, C:B, C:E, C:G, F:A, F:B, F:C, F:E, F:G, G:E | A:B, A:E, A:G, C:A, C:B, C:G, F:A, F:B, F:C, F:E, F:G |
| <b>Glucose</b>       | A:E, B:E, C:E, F:E, G:E                                         | B:E, F:E                                              |
| <b>G6P</b>           | A:G, C:A, C:D, C:E, F:C, F:G, G:D, G:E                          | F:B, F:C, F:E, F:G                                    |
| <b>Sucrose</b>       | A:D, A:E, B:D, B:E, C:D, C:E, E:D, F:D, F:E, G:D, G:E           | A:E, B:E, C:D, C:E, E:D, F:E, G:E                     |
| <b>Glycerol-1P</b>   | A:D, A:E, B:D, B:E, C:D, C:E, E:D, F:D, F:E, G:D, G:E           | A:D, A:E, B:D, B:E, C:D, C:E, E:D, F:D, F:E, G:D, G:E |
